# Supplementary material for: Transgenerational inheritance of paternal DNA damage by linker histone H1-mediated DNA repair restriction
Source: Research Square preprint supplement (doi:10.21203/rs.3.rs-1602124/v1), 2022-05-06
Supplement: Supplementary file 1 [file 06efd30d404ed9e916eb2047.xlsx]

## Sheet: Figure 1a
Figure 1a
One-way ANOVA
ANOVA summary (Maternal exposure)
F	60.39
P value	<0.0001
P value summary	****
Significant diff. among means (P < 0.05)?	Yes
R squared	0.9452
Bonferroni's multiple comparisons test	Mean Diff.	95.00% CI of diff.	Below threshold?	Summary	Adjusted P Value
Δf vs. Δff 30Gy	32.16	13.50 to 50.83	Yes	***	0.0005
Δf vs. Δfm 30Gy	36.93	17.80 to 56.06	Yes	***	0.0001
Δf vs. Δff 60Gy	89.97	67.88 to 112.1	Yes	****	<0.0001
Δf vs. Δfm 60Gy	90.93	68.84 to 113.0	Yes	****	<0.0001
ANOVA summary (Paternal exposure)
F	37.18
P value	<0.0001
P value summary	****
Significant diff. among means (P < 0.05)?	Yes
R squared	0.788
Bonferroni's multiple comparisons test	Mean Diff.	95.00% CI of diff.	Below threshold?	Summary	Adjusted P Value
Δm vs. Δmf 30Gy	-11.45	-39.56 to 16.67	No	ns	>0.9999
Δm vs. Δmm 30Gy	-6.082	-34.38 to 22.22	No	ns	>0.9999
Δm vs. Δmf 60Gy	-68.95	-101.2 to -36.74	Yes	****	<0.0001
Δm vs. Δmm 60Gy	-24.62	-58.15 to 8.902	No	ns	0.3553
Δm vs. Δmf 90Gy	-82.35	-114.3 to -50.35	Yes	****	<0.0001
Δm vs. Δmm 90Gy	-57.54	-90.00 to -25.08	Yes	****	<0.0001
Δmf vs. Δmm 30Gy	5.363	-12.71 to 23.44	No	ns	>0.9999
Δmf vs. Δmm 60Gy	44.33	22.53 to 66.14	Yes	****	<0.0001
Δmf vs. Δmm 90Gy	24.81	5.026 to 44.59	Yes	**	0.0054

## Sheet: Figure 1b
Figure 1b
One-way ANOVA
ANOVA summary (fog-2)
F	170.4
P value	<0.0001
P value summary	****
Significant diff. among means (P < 0.05)?	Yes
R squared	0.9861
Bonferroni's multiple comparisons test	Mean Diff.	95.00% CI of diff.	Below threshold?	Summary	Adjusted P Value
Δmf vs. Δmm	41.08	31.72 to 50.43	Yes	****	<0.0001
ANOVA summary (spe-8)
F	45.54
P value	<0.0001
P value summary	****
Significant diff. among means (P < 0.05)?	Yes
R squared	0.9499
Bonferroni's multiple comparisons test	Mean Diff.	95.00% CI of diff.	Below threshold?	Summary	Adjusted P Value
Δmf vs. Δmm	43.6	26.41 to 60.80	Yes	***	0.0001

## Sheet: Figure 1c
Figure 1c
One-way ANOVA
ANOVA summary (Day 1)
F	62.13
P value	<0.0001
P value summary	****
Significant diff. among means (P < 0.05)?	Yes
R squared	0.9395
Bonferroni's multiple comparisons test	Mean Diff.	95.00% CI of diff.	Below threshold?	Summary	Adjusted P Value
Δmf vs. Δmm fog-2	58.65	42.04 to 75.25	Yes	****	<0.0001
Δmf vs. Δmm spe-8	51.34	38.48 to 64.21	Yes	****	<0.0001
ANOVA summary (Day 2)
F	1.098
P value	0.4046
P value summary	ns
Significant diff. among means (P < 0.05)?	No
R squared	0.2916
Bonferroni's multiple comparisons test	Mean Diff.	95.00% CI of diff.	Below threshold?	Summary	Adjusted P Value
Δmf vs. Δmm fog-2	5.557	-7.396 to 18.51	No	ns	0.5435
Δmf vs. Δmm spe-8	5.73	-7.223 to 18.68	No	ns	0.5164

## Sheet: Figure 3b
Figure 3b
Adjusted p-values are shown for each base combination
Position around Breakpoint indicated In yellow	Type 1
		-4	-3	-2	-1	0	1	2	3
	-4	0.990318	1	1	1	1	0.990318	0.941948	1
	-3	1	0.941948	0.941948	1	0.941948	0.941948	0.990318	1
	-2	0.941948	0.941948	0.990318	0.941948	0.941948	0.941948	0.990318	0.941948
	-1	1	0.990318	0.941948	0.941948	1	0.941948	0.941948	0.941948
	0	1	0.941948	1	0.00256	0.941948	1	0.941948	1
	1	0.941948	1	0.941948	1	1	1	1	1
	2	0.941948	1	1	1	0.941948	1	0.941948	1
	3	0.941948	1	0.941948	1	1	0.941948	0.941948	1

## Sheet: Figure 3c
Figure 3c
One-way ANOVA 60Gy
ANOVA summary (Control)
F	1.195
P value	0.3716
P value summary	ns
Significant diff. among means (P < 0.05)?	No
R squared	0.3095
Bonferroni's multiple comparisons test	Mean Diff.	95.00% CI of diff.	Below threshold?	Summary	Adjusted P Value
fog-2 vs. brc-1; fog-2	-0.4767	-2.602 to 1.649	No	ns	>0.9999
fog-2 vs. cku-70; fog-2	0.57	-1.555 to 2.695	No	ns	>0.9999
fog-2 vs. polq-1; fog-2	-0.6433	-2.769 to 1.482	No	ns	>0.9999
ANOVA summary (Δm)
F	57.18
P value	<0.0001
P value summary	****
Significant diff. among means (P < 0.05)?	Yes
R squared	0.9554
Bonferroni's multiple comparisons test	Mean Diff.	95.00% CI of diff.	Below threshold?	Summary	Adjusted P Value
fog-2 vs. brc-1; fog-2	-8.253	-25.51 to 9.008	No	ns	0.5619
fog-2 vs. cku-70; fog-2	-12.66	-29.92 to 4.598	No	ns	0.1736
fog-2 vs. polq-1; fog-2	-67.28	-84.54 to -50.02	Yes	****	<0.0001
ANOVA summary (Δmf and Δmm)
F	22.74
P value	<0.0001
P value summary	****
Significant diff. among means (P < 0.05)?	Yes
R squared	0.7398
Bonferroni's multiple comparisons test	Mean Diff.	95.00% CI of diff.	Below threshold?	Summary	Adjusted P Value
fog-2 vs. brc-1; fog-2 Δmf	-1.912	-17.88 to 14.05	No	ns	>0.9999
fog-2 vs. cku-70; fog-2 Δmf	-10.63	-26.12 to 4.861	No	ns	0.321
fog-2 vs. brc-1; fog-2 Δmm	2.39	-14.61 to 19.39	No	ns	>0.9999
fog-2 vs. cku-70; fog-2 Δmm	-30.53	-49.27 to -11.80	Yes	***	0.0005
One-way ANOVA 90Gy
ANOVA summary (Control)
F	1.195
P value	0.3716
P value summary	ns
Significant diff. among means (P < 0.05)?	No
R squared	0.3095
Bonferroni's multiple comparisons test	Mean Diff.	95.00% CI of diff.	Below threshold?	Summary	Adjusted P Value
fog-2 vs. brc-1; fog-2	-0.4767	-2.602 to 1.649	No	ns	>0.9999
fog-2 vs. cku-70; fog-2	0.57	-1.555 to 2.695	No	ns	>0.9999
fog-2 vs. polq-1; fog-2	-0.6433	-2.769 to 1.482	No	ns	>0.9999
ANOVA summary (Δm)
F	57.18
P value	<0.0001
P value summary	****
Significant diff. among means (P < 0.05)?	Yes
R squared	0.9554
Bonferroni's multiple comparisons test	Mean Diff.	95.00% CI of diff.	Below threshold?	Summary	Adjusted P Value
fog-2 vs. brc-1; fog-2	-3.287	-20.64 to 14.06	No	ns	>0.9999
fog-2 vs. cku-70; fog-2	-38.88	-56.23 to -21.53	Yes	***	0.0004
fog-2 vs. polq-1; fog-2	-68.08	-85.43 to -50.73	Yes	****	<0.0001
ANOVA summary (Δmf and Δmm)
F	22.74
P value	<0.0001
P value summary	****
Significant diff. among means (P < 0.05)?	Yes
R squared	0.7398
Bonferroni's multiple comparisons test	Mean Diff.	95.00% CI of diff.	Below threshold?	Summary	Adjusted P Value
fog-2 vs. brc-1; fog-2 Δmf	-0.974	-8.958 to 7.010	No	ns	>0.9999
fog-2 vs. cku-70; fog-2 Δmf	-1.354	-8.633 to 5.925	No	ns	>0.9999
fog-2 vs. brc-1; fog-2 Δmm	1.34	-6.358 to 9.038	No	ns	>0.9999
fog-2 vs. cku-70; fog-2 Δmm	-21.72	-30.75 to -12.68	Yes	****	<0.0001

## Sheet: Figure 3d
Figure 3d
One-way ANOVA
ANOVA summary
F	390.4
P value	<0.0001
P value summary	****
Significant diff. among means (P < 0.05)?	Yes
R squared	0.9932
Bonferroni's multiple comparisons test	Mean Diff.	95.00% CI of diff.	Below threshold?	Summary	Adjusted P Value
fog-2 ♂ fog-2 ♀ vs. fog-2 ♂ polq-1;fog-2 ♀	-83.08	-93.92 to -72.25	Yes	****	<0.0001
fog-2 ♂ fog-2 ♀ vs. polq-1;fog-2 ♂ fog-2 ♀	-0.39	-11.23 to 10.45	No	ns	0.9994
fog-2 ♂ fog-2 ♀ vs. polq-1;fog-2 ♂ polq-1;fog-2 ♀	-81.04	-91.88 to -70.21	Yes	****	<0.0001
fog-2 ♂ polq-1;fog-2 ♀ vs. polq-1;fog-2 ♂ fog-2 ♀	82.69	71.86 to 93.53	Yes	****	<0.0001
fog-2 ♂ polq-1;fog-2 ♀ vs. polq-1;fog-2 ♂ polq-1;fog-2 ♀	2.04	-8.796 to 12.88	No	ns	0.9283
polq-1;fog-2 ♂ fog-2 ♀ vs. polq-1;fog-2 ♂ polq-1;fog-2 ♀	-80.65	-91.49 to -69.82	Yes	****	<0.0001

## Sheet: Figure 4c
Figure 4c
Unpaired t test (control)
P value	0.149
P value summary	ns
Significantly different (P < 0.05)?	No
One- or two-tailed P value?	Two-tailed
t, df	t=1.784, df=4
Unpaired t test (Δm 60Gy)
P value	0.1087
P value summary	ns
Significantly different (P < 0.05)?	No
One- or two-tailed P value?	Two-tailed
t, df	t=2.058, df=4
One-way ANOVA (Δmf and Δmm 60Gy)
F	77.09
P value	<0.0001
P value summary	****
Significant diff. among means (P < 0.05)?	Yes
R squared	0.8818
Bonferroni's multiple comparisons test	Mean Diff.	95.00% CI of diff.	Below threshold?	Summary	Adjusted P Value
fog-2 vs. his-24; fog-2 Δmf	68.24	55.12 to 81.36	Yes	****	<0.0001
fog-2 vs. his-24; fog-2 Δmm	43	28.73 to 57.28	Yes	****	<0.0001
Unpaired t test (Δm 90Gy)
P value	0.0815
P value summary	ns
Significantly different (P < 0.05)?	No
One- or two-tailed P value?	Two-tailed
t, df	t=2.316, df=4
One-way ANOVA (Δmf and Δmm 90Gy)
F	66.85
P value	<0.0001
P value summary	****
Significant diff. among means (P < 0.05)?	Yes
R squared	0.8852
Bonferroni's multiple comparisons test	Mean Diff.	95.00% CI of diff.	Below threshold?	Summary	Adjusted P Value
fog-2 vs. his-24; fog-2 Δmf	63.41	49.56 to 77.25	Yes	****	<0.0001
fog-2 vs. his-24; fog-2 Δmm	48.5	33.67 to 63.33	Yes	****	<0.0001

## Sheet: Figure 4e
Figure 4e
One-way ANOVA (Δmf)
ANOVA summary
F	174.4
P value	<0.0001
P value summary	****
Significant diff. among means (P < 0.05)?	Yes
R squared	0.451
Bonferroni's multiple comparisons test	Mean Diff.	95.00% CI of diff.	Below threshold?	Summary	Adjusted P Value
EV (RNAi); fog-2 0Gy vs. EV (RNAi); fog-2 90Gy	0.3162	0.1870 to 0.4453	Yes	****	<0.0001
EV (RNAi); fog-2 90Gy vs. his-24 (RNAi); fog-2 90Gy	0.9465	0.8274 to 1.066	Yes	****	<0.0001
EV (RNAi); fog-2 90Gy vs. hpl-1 (RNAi); fog-2 90Gy	0.9143	0.7977 to 1.031	Yes	****	<0.0001
One-way ANOVA (Δmm)
ANOVA summary
F	688
P value	<0.0001
P value summary	****
Significant diff. among means (P < 0.05)?	Yes
R squared	0.7042
Bonferroni's multiple comparisons test	Mean Diff.	95.00% CI of diff.	Below threshold?	Summary	Adjusted P Value
EV (RNAi); fog-2 0Gy vs. EV (RNAi); fog-2 90Gy	-0.465	-0.5142 to -0.4158	Yes	****	<0.0001
EV (RNAi); fog-2 90Gy vs. his-24 (RNAi); fog-2 90Gy	0.836	0.7881 to 0.8839	Yes	****	<0.0001
EV (RNAi); fog-2 90Gy vs. hpl-1 (RNAi); fog-2 90Gy	0.7094	0.6614 to 0.7574	Yes	****	<0.0001

## Sheet: Figure 4f
Figure 4f
Unpaired t test (Δm 90Gy)
P value	0.3824
P value summary	ns
Significantly different (P < 0.05)?	No
One- or two-tailed P value?	Two-tailed
t, df	t=0.9804, df=4
One-way ANOVA (Δmf and Δmm 90Gy)
F	47.31
P value	<0.0001
P value summary	****
Significant diff. among means (P < 0.05)?	Yes
R squared	0.8554
Bonferroni's multiple comparisons test	Mean Diff.	95.00% CI of diff.	Below threshold?	Summary	Adjusted P Value
fog-2 vs. hpl-1; fog-2 Δmf	19.61	4.946 to 34.27	Yes	**	0.0077
fog-2 vs. hpl-1; fog-2 Δmm	51.18	36.52 to 65.84	Yes	****	<0.0001

## Sheet: Figure 5b
Figure 5b
Nested One-way ANOVA (Δmf)
ANOVA summary
P value	<0.0001
P value summary	****
Significantly different (P < 0.05)?	Yes
F, DFn, Dfd	21.22, 3, 19
Bonferroni's multiple comparisons test	Mean Diff.	95.00% CI of diff.	Below threshold?	Summary	Adjusted P Value
EV (RNAi); fog-2 0Gy vs. EV (RNAi); fog-2 90Gy	2.44	0.9020 to 3.979	Yes	**	0.0016
EV (RNAi); fog-2 90Gy vs. his-24 (RNAi); fog-2 90Gy	-1.142	-2.562 to 0.2784	No	ns	0.1449
EV (RNAi); fog-2 90Gy vs. hpl-1 (RNAi); fog-2 90Gy	-1.45	-2.751 to -0.1496	Yes	*	0.0259
Nested One-way ANOVA (Δmm)
ANOVA summary
P value	<0.0001
P value summary	****
Significantly different (P < 0.05)?	Yes
F, DFn, Dfd	47.19, 3, 10
Bonferroni's multiple comparisons test	Mean Diff.	95.00% CI of diff.	Below threshold?	Summary	Adjusted P Value
EV (RNAi); fog-2 0Gy vs. EV (RNAi); fog-2 90Gy	0.2095	-0.4975 to 0.9164	No	ns	0.7446
EV (RNAi); fog-2 90Gy vs. his-24 (RNAi); fog-2 90Gy	-1.424	-2.038 to -0.8102	Yes	***	0.0002
EV (RNAi); fog-2 90Gy vs. hpl-1 (RNAi); fog-2 90Gy	-1.894	-2.451 to -1.337	Yes	****	<0.0001

[truncated: 8 more sheets: Figure 5c, Sup. Figure 5e, Sup. Figure 5f, Sup. Figure 5h, Sup. Figure 6a, Sup. Figure 6b, Sup. Figure 6c, Sup. Figure 7]
